# Supplementary material
Source: MDPI journal article supplement (https://www.mdpi.com/2076-3263/8/2/40)

Figure S1. Plots of summer measurements of Secchi depth, chlorophyll, and total phosphorus for the period from 1972 through 2015 in each of 23 Iowa lakes. Lines are shown for statistically significant regressions. Also shown are plots of rates of carbon burial based on  $^{210}\text{Pb}$  dating of sediment cores from these lakes using data from Heathcore et al. [11] for the period 1900-2008. The vertical dashed line indicates the year 1971 to set off the period with field measurements.

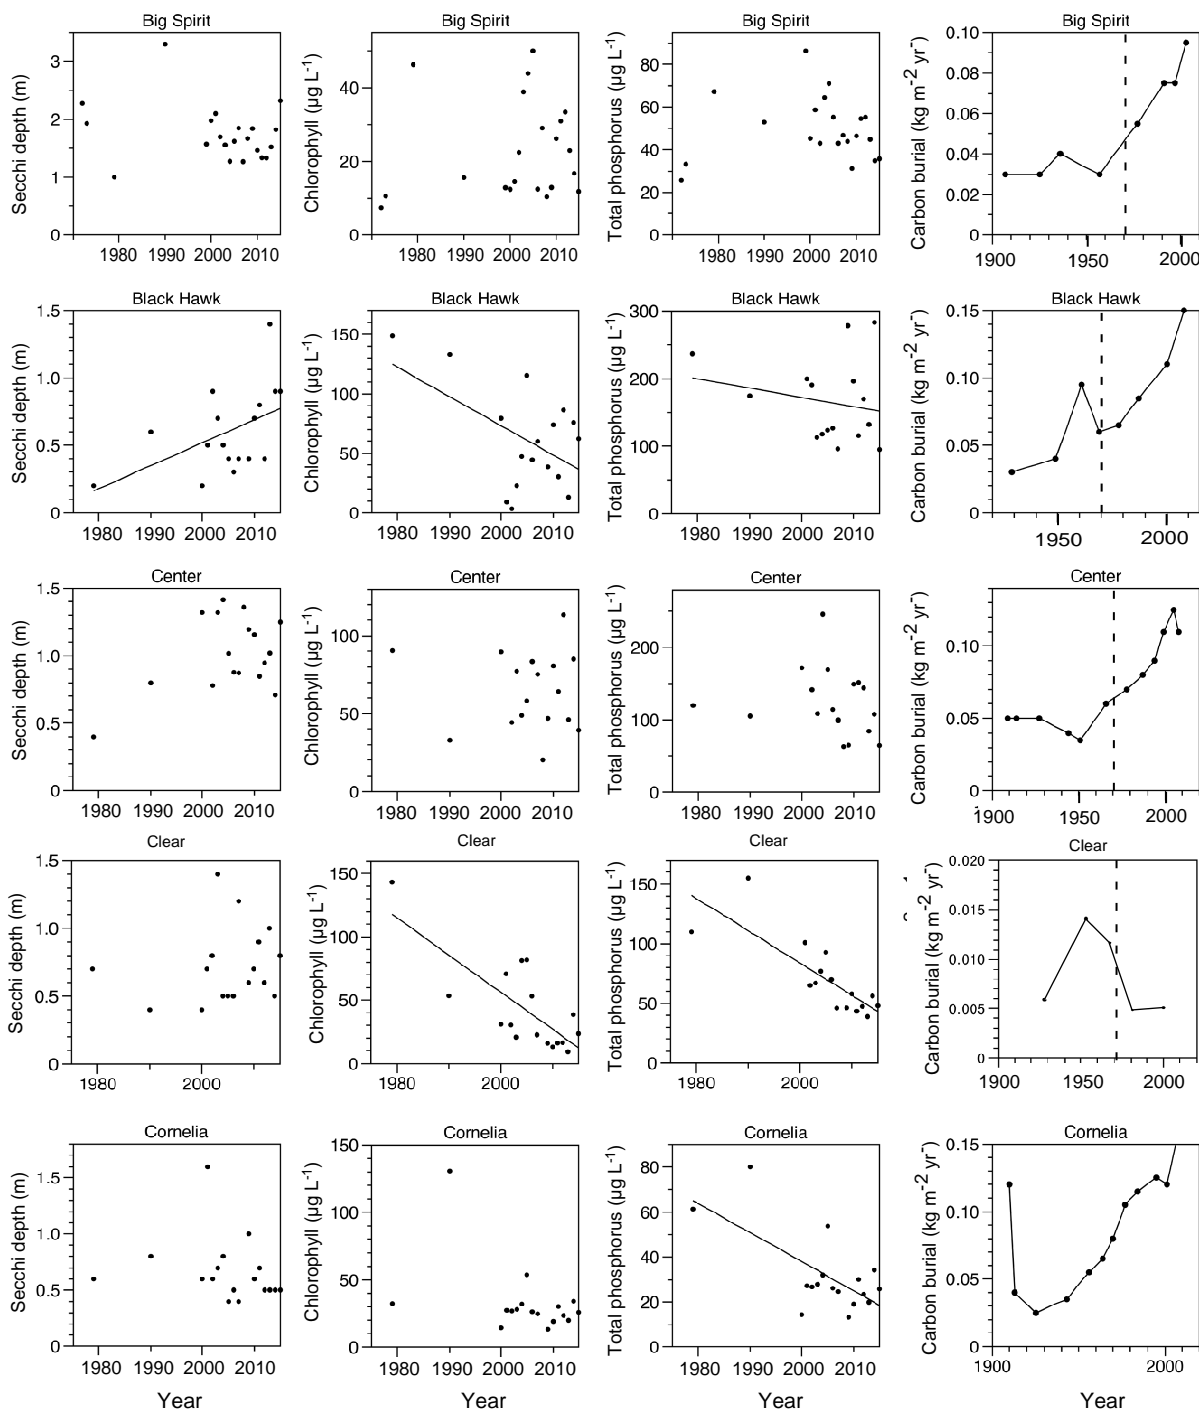

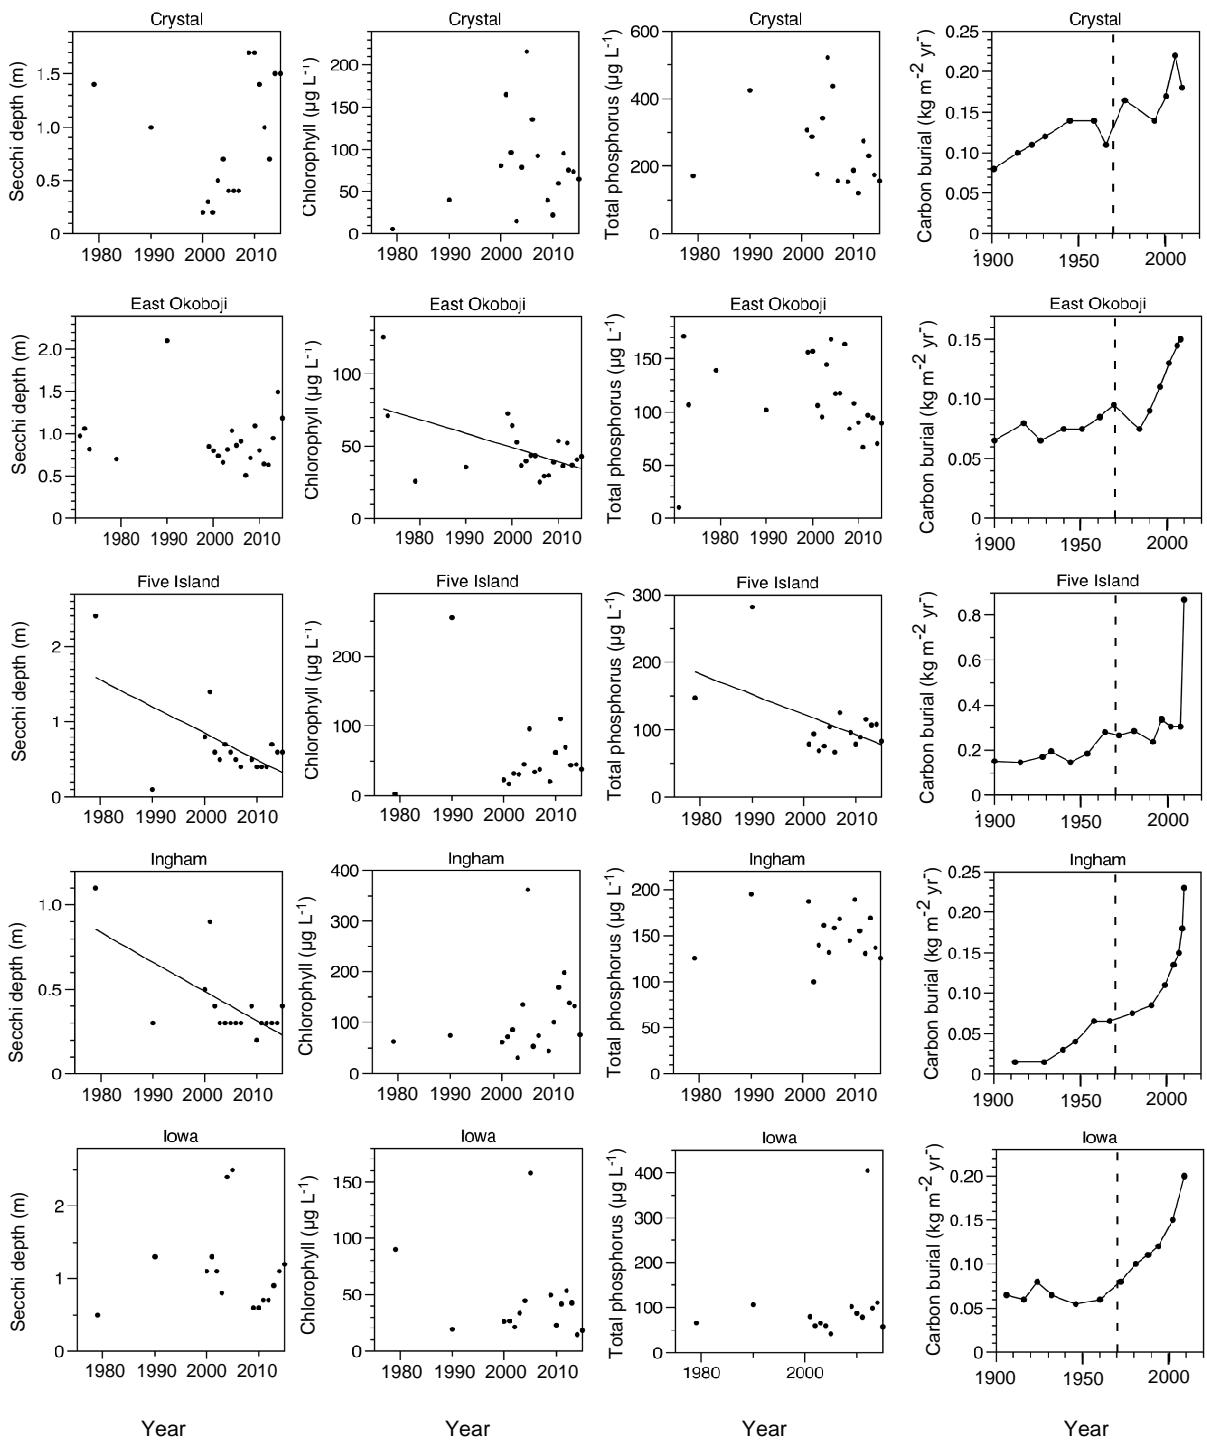

Figure S1. Page 2 of 5

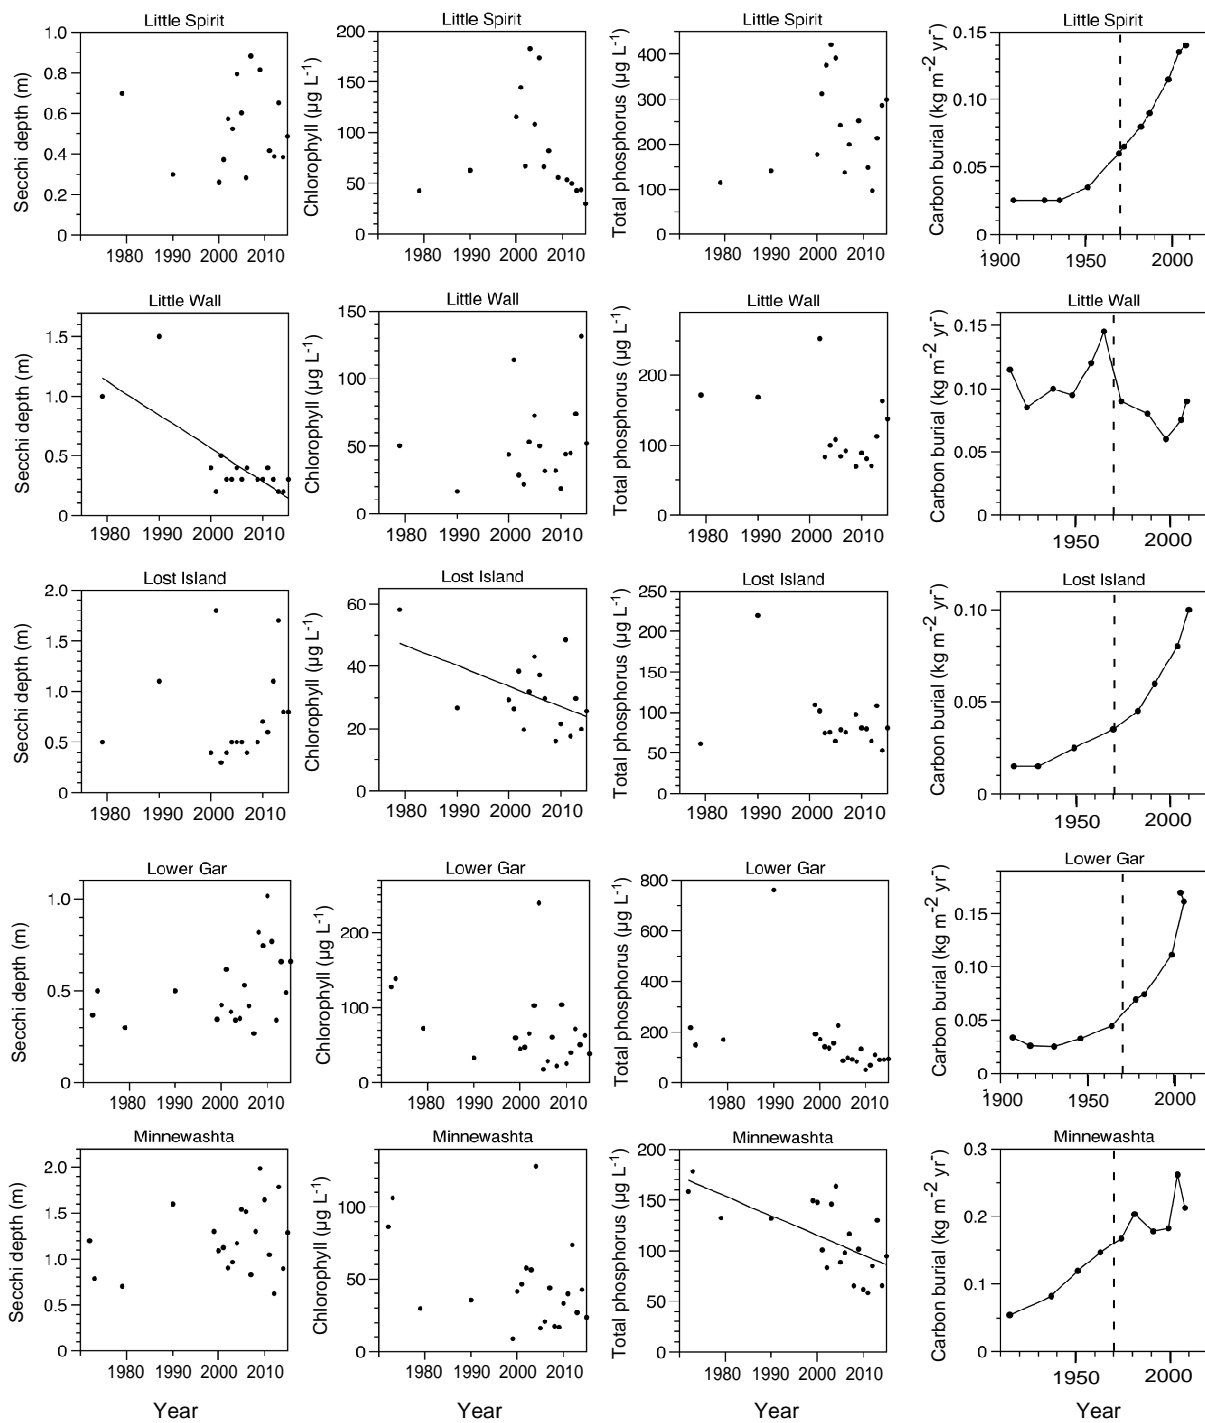

Figure S1. Page 3 of 5

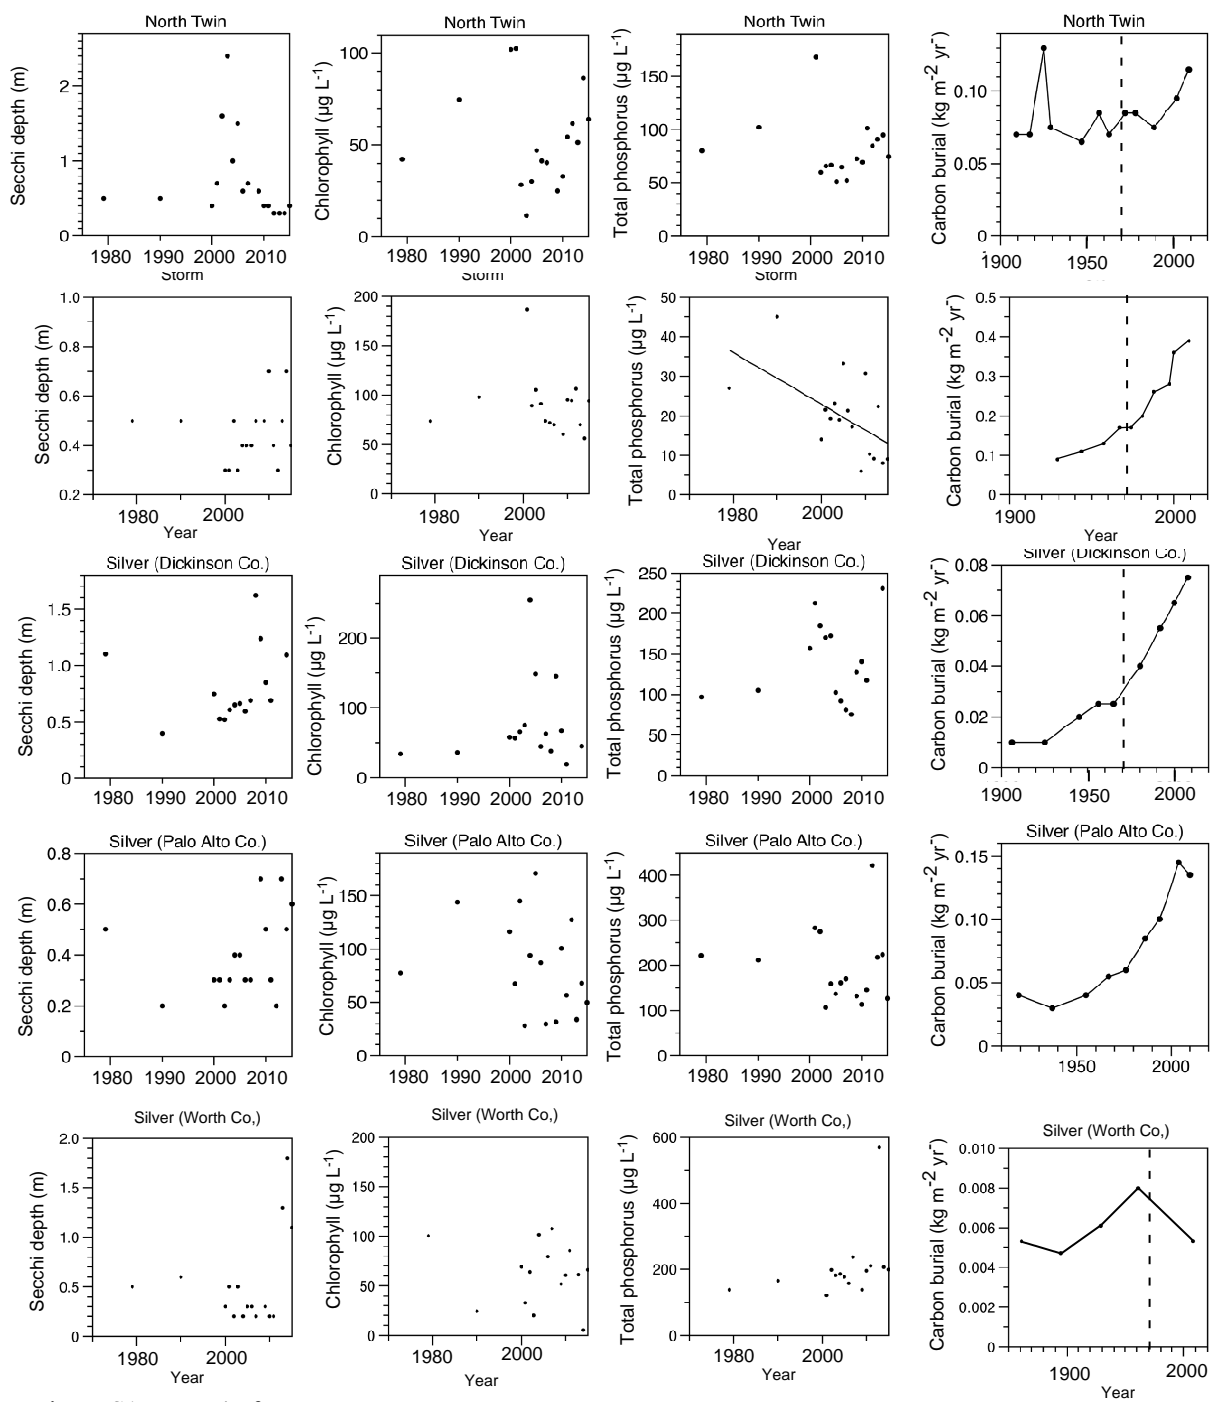

Figure S1. Page 4 of 5

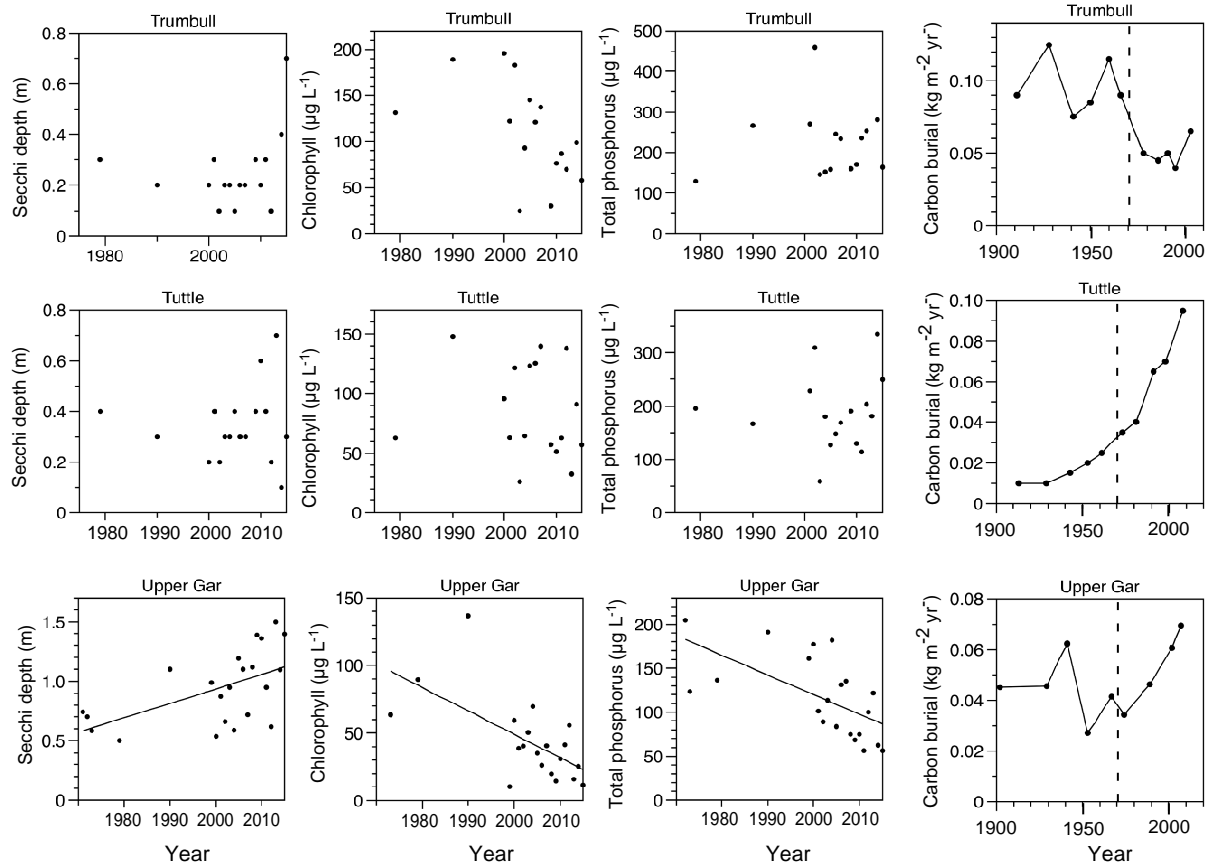

Supplement: s1 [file s1]
